# Supplementary material
Source: PubMed Central journal article supplement (PMC6015773)
Supplement: NIHMS935635-supplement-1.pdf [file NIHMS935635-supplement-1.pdf]

# Acoustically modulated magnetic resonance imaging of gas-filled protein nanostructures

George J. Lu<sup>1</sup>, Arash Farhadi<sup>2</sup>, Jerzy O. Szablowski<sup>1</sup>, Audrey Lee-Gosselin<sup>1</sup>, Samuel R. Barnes<sup>3</sup>, Anupama Lakshmanan<sup>2</sup>, Raymond W. Bourdeau<sup>1</sup>, Mikhail G. Shapiro<sup>1\*</sup>

<sup>1</sup>Division of Chemistry and Chemical Engineering, <sup>2</sup>Division of Biology and Biological Engineering, California Institute of Technology, Pasadena, CA 91125, USA. <sup>3</sup>Department of Radiology, Loma Linda University, Loma Linda, CA.

\* Correspondence should be addressed to M.G.S. (mikhail@caltech.edu)

## Supplementary Information

### Theoretical consideration of the T2/T2\* relaxation produced by gas vesicles

Relaxation theory<sup>1-7</sup> describes the T2/T2\* relaxation of water near a contrast agent in three primary regimes: (1) the motional averaging regime, where  $\Delta\omega_r \cdot \tau_D \ll 1$ ; (2) the static dephasing regime, where  $\Delta\omega_r \cdot \tau_D \gg 1$ ; and (3) the intermediate regime, where  $\Delta\omega_r \cdot \tau_D \sim 1$ . Here  $\Delta\omega_r$  is the root-mean-square frequency shift at the surface of the contrast agent and  $\tau_D$  is the time for a water molecule to diffuse across the distance of the contrast agent's radius. Considering a single gas vesicle (GV) at high field (Fig. 1b), we obtain  $\Delta\omega_r \approx \Delta\chi \cdot \gamma B_0 \approx 10^3 \text{ Hz}$  and  $\tau_D \approx 10^{-6} \text{ sec}$ ; therefore T2/T2\* relaxation on the nanoscale (*e.g.*, everywhere inside an agarose well containing GVs) occurs in the motional averaging regime. At the same time, the macroscale  $\Delta B$  field around a millimetre-sized agarose well containing GVs (at a volume fraction of  $\sim 0.01\%$ ) (Fig. 1d) has a predicted  $\Delta\omega_r \approx 10^{-1} \text{ Hz}$  and  $\tau_D \approx 10^3 \text{ sec}$ , resulting in T2/T2\* relaxation in the static dephasing regime.

These relaxation regimes are manifest in the T2-weighted and T2\*-weighted images shown in Supplementary Fig. 1. The spin relaxation at the centre of the well is predominantly a result of the nanoscale  $\Delta B$  field, while the spin relaxation near the rim of the wells results from the macroscale  $\Delta B$  field. The rim usually appears darker than the centre of the well in T2\*-weighted images because of the more efficient relaxation of water <sup>1</sup>H in the static dephasing regime than in the motional averaging regime. On the other hand, the rim of the wells lacks hypointense contrast in T2-weighted images, since  $\pi$  pulses can effectively refocus the dephasing of <sup>1</sup>H spins in the static dephasing regime.

Relaxation theory also sheds light on the behaviour of clustered GVs. The micron-size GV clusters are predicted to have  $\tau_D \approx 10^{-3} \text{ sec}$  and are therefore shifting the water <sup>1</sup>H relaxation from the motional averaging regime to the intermediate regime, resulting in strong enhancement of both T2\* and T2 relaxation (Fig. 6).

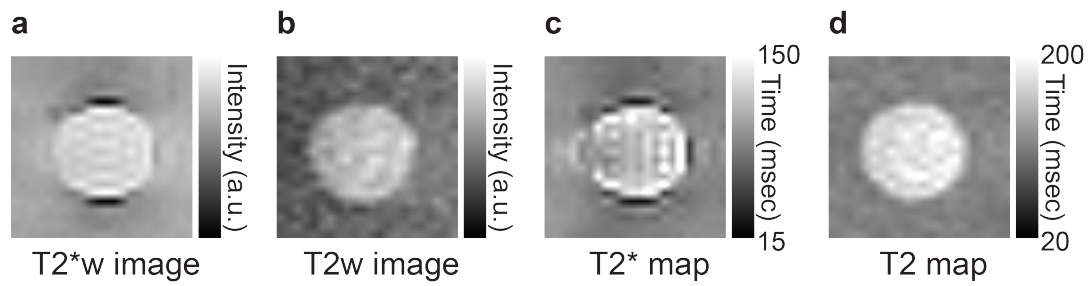

**Supplementary Figure 1 | Representative images of GV-containing well in the agarose phantom.** **a**, T2\*-weighted (T2\*w) and **b**, T2-weighted (T2w) images at echo time TE = 45 msec. **c**, T2\* and T2 map, where pixel-wise T2/T2\* relaxation times are plotted. The rim of the wells is marked by the hypointense contrast in the T2\*w image and T2\* map (**a, c**) and the absence of the contrast in the T2w image and T2 map (**b, d**). In all the images, B<sub>0</sub> fields are along the vertical direction, and the well contained 1.42 nM Halo GVs.

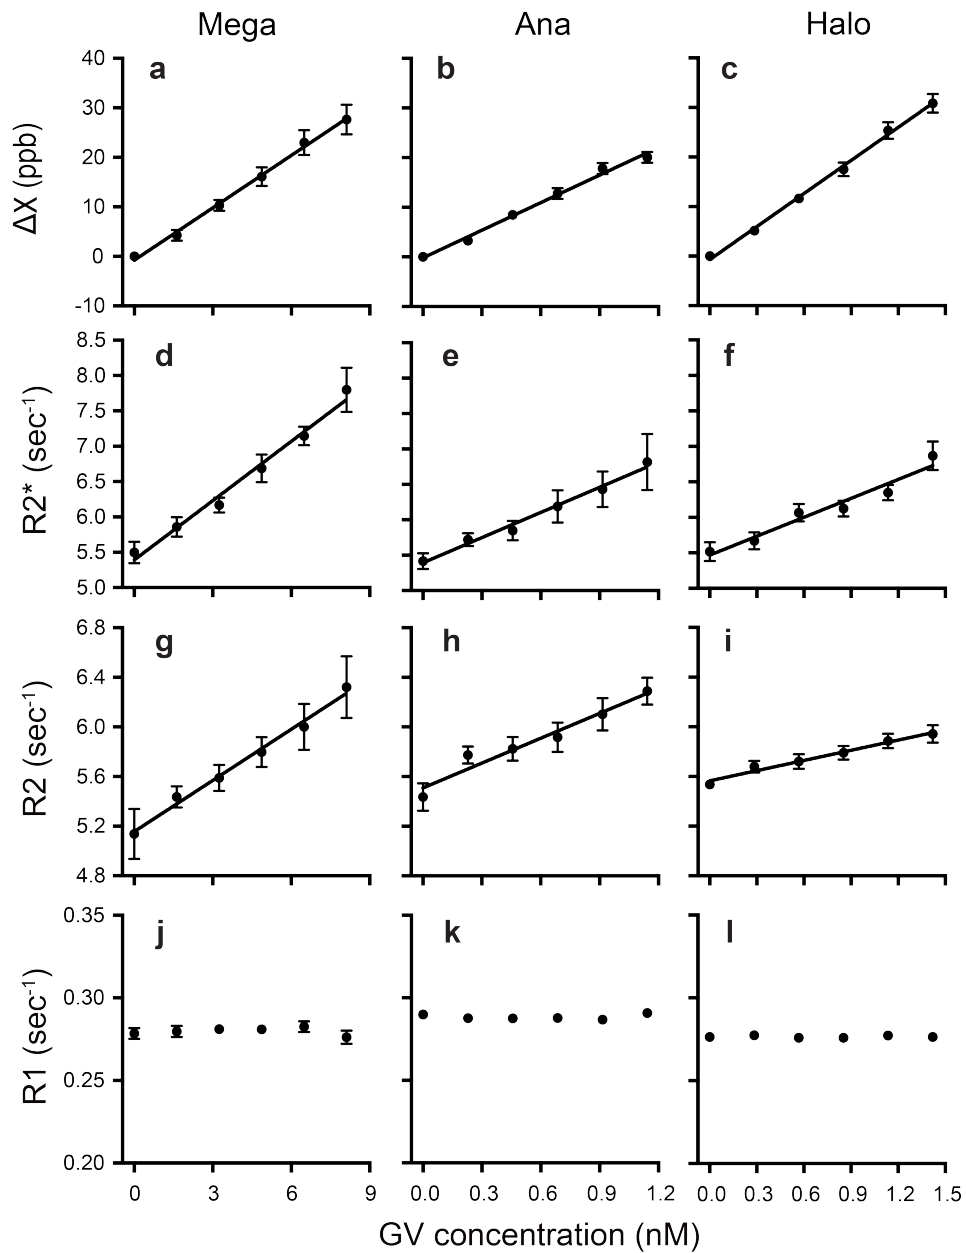

**Supplementary Figure 2 | Molar magnetic susceptibility and T2\*, T2 and T1 relaxivities of the three types of GVs used in this study.** **a-c**, susceptibility in the unit of parts per billion (ppb), **d-f**, T2\* relaxometry, **g-i**, T2 relaxometry and **j-l** T1 relaxometry measurements on GVs from *Bacillus megaterium* (Mega, **a**, **d**, **g**, **j**), *Anabaena flos-aquae* (Ana, **b**, **e**, **h**, **k**) and *Halobacterium salinarum* (Halo, **c**, **f**, **i**, **l**). Error bars represent SEM. N = 9 independent samples for all susceptibility and R2\* measurements. For T2 and T1 measurements, N = 6 independent samples for Mega and Ana GVs and N = 9 for Halo GVs. Relaxivity values calculated from linear regression fitting of the slope are listed in Supplementary Table 1.

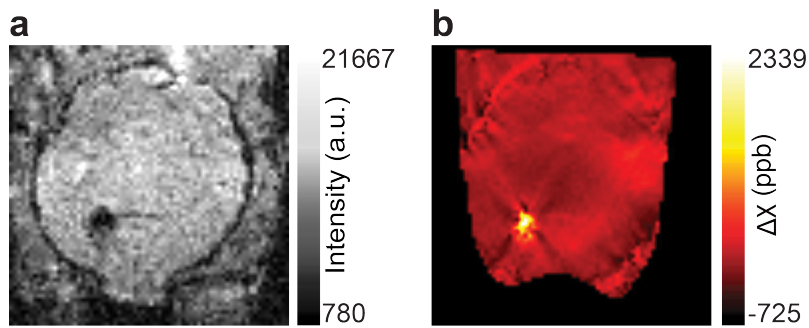

**Supplementary Figure 3 | Quantitative susceptibility mapping (QSM) of GV contrast *in vivo*.** **a**, T2\*-weighted image of a coronal slice from a 3D multi gradient echo (MGE) image of the mouse brain. The hypointense contrast inside the brain tissue corresponds to the site of GV injection. **b**, The same slice rendered from QSM processing of the 3D image.

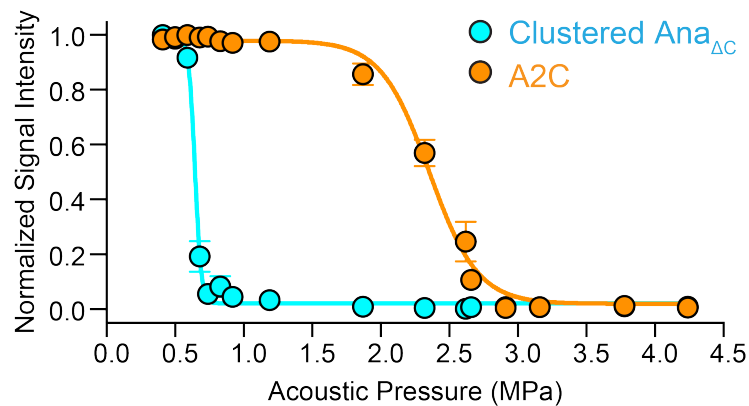

**Supplementary Figure 4 | Acoustic collapse measurement of clustered  $Ana_{\Delta C}$  and *E. coli* expressing A2C GVs.** Ultrasound images were acquired after sequentially exposing the samples to insonation at increasing acoustic pressures, and the collapse of GVs were monitored as a decrease of the image intensity.  $N = 3$  independent samples, and the error bars represent SEM. Sigmoidal collapse curve was obtained by nonlinear least-square fitting.

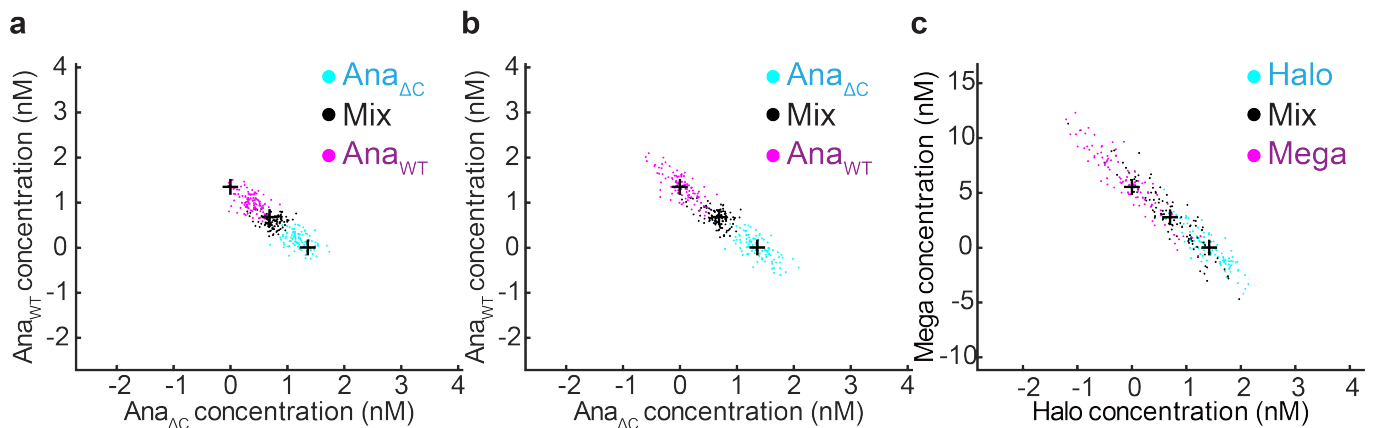

**Supplementary Figure 5 | Monte Carlo simulation of error distributions in the two multiplexing methods.** **a-b**, Simulated distribution of apparent GV concentrations calculated by **(a)** simple acoustic multiplexing or **(b)** acoustic multiplexing with the help of spectral unmixing, based on experimental values in Fig. 5 c-d. **c**, Simulated distribution of apparent GV concentrations by multiparametric multiplexing using the inputs derived from the experimentally measured values in Fig. 6, b-c. Black plus signs represent true values of GV concentrations, and individual dots (magenta, cyan or black) represent individual simulations with randomized input of errors. Details of the simulation are provided in Methods.

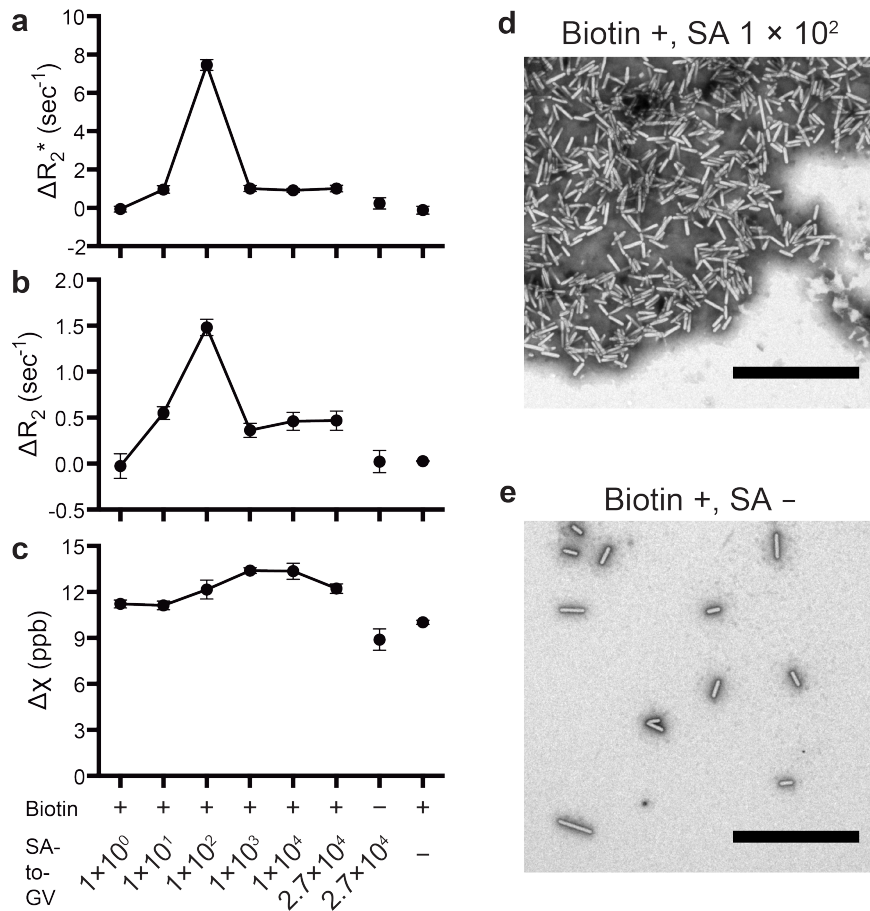

**Supplementary Figure 6 | Impact of streptavidin to gas vesicle (SA-to-GV) stoichiometry on T2/T2\* relaxation.** **a-c**,  $\Delta R_2^*$ ,  $\Delta R_2$  and  $\Delta X$ , respectively, of samples with various SA-to-GV ratios and the two control samples that lack either SA or biotin. The SA-to-GV ratios are listed below the graph, and the values of susceptibility are relative to sample containing PBS buffer. N = 3 independent samples. Error bars represent SEM. **d**, **e**, Representative TEM images of clustered and unclustered GV, respectively. A large number of GVs were observed inside each cluster, while the clusters were distributed much more sparsely than single GVs on the TEM grid. Scale bars represent 4  $\mu$ m.

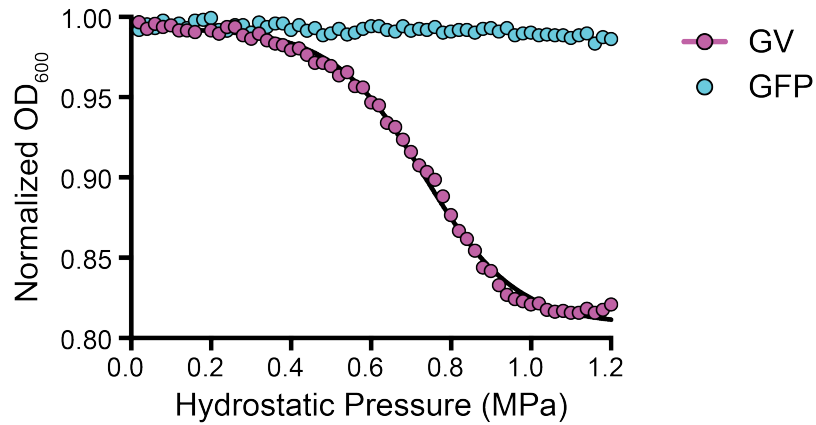

**Supplementary Figure 7 | Representative hydrostatic collapse measurement of *E. coli* cells.** *E. coli* cells at optical density at 600 nm ( $OD_{600}$ )  $\sim 1.0$  were loaded into a sealed cuvette with path length 1.00 cm. Hydrostatic pressure was ramped stepwise from 0 to 1.2 MPa and  $OD_{600}$  was recorded in each step. Cells expressing A2C GVs (magenta) showed a sigmoidal drop in  $OD_{600}$ , characteristic of the collapse of intracellular GV. Cells that do not contain GV, such as those expressing the green fluorescent protein (GFP), did not show a drop in  $OD_{600}$ . The ratios of post- to pre-collapse optical density were between 0.806 and 0.853 ( $N = 6$  independent samples), and the post-collapse  $OD_{600}$  of each sample was used for quantifying cell density for preparing MRI phantoms.

|                                                                  | Mega          | Ana          | Halo          |
|------------------------------------------------------------------|---------------|--------------|---------------|
| <b>GV geometry</b>                                               |               |              |               |
| Length (nm)                                                      | 249 ± 13      | 519 ± 15     | 400 ± 10      |
| Width (nm)                                                       | 72.5 ± 1.7    | 136.3 ± 2.0  | 250.8 ± 4.6   |
| Number of particles measured                                     | N=61          | N=107        | N=125         |
| <b>GV concentration relationships</b>                            |               |              |               |
| Protein concentration to OD <sub>500</sub> ratio ([μg/mL] / OD)  | 145.5 ± 6.4   | 36.6 ± 2.6   | 13.4 ± 2.2    |
| Estimated molecular weight (MDa)                                 | 71.7          | 320          | 282           |
| Molar protein concentration to OD <sub>500</sub> ratio (pM / OD) | 2,030         | 114          | 47.3          |
| <b>GV MRI properties</b>                                         |               |              |               |
| Molar susceptibility (ppb / nM)                                  | 3.52 ± 0.27   | 18.53 ± 0.91 | 22.2 ± 1.0    |
| Mass susceptibility (ppb / [mg/mL])                              | 39.2 ± 3.0    | 57.2 ± 2.8   | 80.9 ± 3.8    |
| Relaxivity r2* (sec <sup>-1</sup> / nM)                          | 0.280 ± 0.027 | 1.19 ± 0.23  | 0.89 ± 0.11   |
| Relaxivity r2* (sec <sup>-1</sup> / [mg/mL])                     | 3.11 ± 0.30   | 3.66 ± 0.71  | 3.24 ± 0.42   |
| Relaxivity r2 (sec <sup>-1</sup> / nM)                           | 0.138 ± 0.023 | 0.67 ± 0.11  | 0.273 ± 0.045 |
| Relaxivity r2 (sec <sup>-1</sup> / [mg/mL])                      | 1.53 ± 0.26   | 2.06 ± 0.34  | 1.00 ± 0.16   |

**Supplementary Table 1. Summary of the geometrical, optical and magnetic properties of three types of gas vesicles (GVs).** Although the size and shape of GV<sub>s</sub> are determined primarily by the genotype, each type possesses certain degree of heterogeneity. For example, Ana GV<sub>s</sub> has length distribution with a standard deviation of 35% of the mean<sup>9</sup>. Errors of GV geometry represent SEM. The protein concentrations of GV<sub>s</sub> were measured by Pierce 660nm protein assay (N = 4, 5, 3 measurements of independent samples of Mega, Ana and Halo GV<sub>s</sub>, respectively). Molar susceptibility and relaxivity correspond to the slopes from linear regression fitting of the MRI measurements in Supplementary Fig. 2, and the errors are the standard error of the slope. r2\* relaxivity was quantified from the center of the agarose wells and excluded the high contrast at the rim of the wells (Supplementary Figure 1).

|            | $\Delta X$ (ppb) |                  | $\Delta R2^*$ (sec <sup>-1</sup> ) |                 | $\Delta R2$ (sec <sup>-1</sup> ) |                 |
|------------|------------------|------------------|------------------------------------|-----------------|----------------------------------|-----------------|
|            | Before US        | After US         | Before US                          | After US        | Before US                        | After US        |
| GV + IPTG  | $1.93 \pm 0.31$  | $-2.73 \pm 0.26$ | $0.97 \pm 0.13$                    | $0.45 \pm 0.08$ | $0.65 \pm 0.03$                  | $0.34 \pm 0.04$ |
| GFP + IPTG | $-1.97 \pm 0.36$ | $-1.82 \pm 0.39$ | $0.32 \pm 0.10$                    | $0.50 \pm 0.09$ | $0.28 \pm 0.04$                  | $0.26 \pm 0.04$ |
| GV         | $-2.75 \pm 0.17$ | $-2.00 \pm 0.19$ | $0.34 \pm 0.10$                    | $0.29 \pm 0.03$ | $0.35 \pm 0.05$                  | $0.33 \pm 0.05$ |
| PBS        | $0 \pm 0.14$     | $0 \pm 0.16$     | $0 \pm 0.09$                       | $0 \pm 0.04$    | $0 \pm 0.02$                     | $0 \pm 0.03$    |

**Supplementary Table 2. MRI measurements of *E. coli* in agarose phantom.** All the values were normalized by those of PBS samples. Errors represent SEM, and N = 6 independent samples.



## Supplementary References

1. Yablonskiy, D.A. & Haacke, E.M. Theory of NMR signal behavior in magnetically inhomogeneous tissues: The static dephasing regime. *Magn. Reson. Med.* **32**, 749-763 (1994).
2. Gillis, P., Moiny, F. & Brooks, R.A. On T2-shortening by strongly magnetized spheres: A partial refocusing model. *Magn. Reson. Med.* **47**, 257-263 (2002).
3. Gillis, P. & Koenig, S.H. Transverse relaxation of solvent protons induced by magnetized spheres: Application to ferritin, erythrocytes, and magnetite. *Magn. Reson. Med.* **5**, 323-345 (1987).
4. Jensen, J.H. & Chandra, R. NMR relaxation in tissues with weak magnetic inhomogeneities. *Magn. Reson. Med.* **44**, 144-156 (2000).
5. Matsumoto, Y. & Jasanoff, A. T2 relaxation induced by clusters of superparamagnetic nanoparticles: Monte Carlo simulations. *Magn. Reson. Imaging* **26**, 994-998 (2008).
6. Bowen, C.V., Zhang, X., Saab, G., Gareau, P.J. & Rutt, B.K. Application of the static dephasing regime theory to superparamagnetic iron-oxide loaded cells. *Magn. Reson. Med.* **48**, 52-61 (2002).
7. Brooks, R.A., Moiny, F. & Gillis, P. On T2-shortening by weakly magnetized particles: The chemical exchange model. *Magn. Reson. Med.* **45**, 1014-1020 (2001).
8. Shaner, N.C. et al. A bright monomeric green fluorescent protein derived from *Branchiostoma lanceolatum*. *Nat Meth* **10**, 407-409 (2013).
9. Walsby, A.E. Gas vesicles. *Microbiological Reviews* **58**, 94-144 (1994).
