# Supplementary material
Source: PubMed Central journal article supplement (PMC6015773)
Supplement: NIHMS935635-supplement-2.pdf [file NIHMS935635-supplement-2.pdf]

## Life Sciences Reporting Summary

Nature Research wishes to improve the reproducibility of the work that we publish. This form is intended for publication with all accepted life science papers and provides structure for consistency and transparency in reporting. Every life science submission will use this form; some list items might not apply to an individual manuscript, but all fields must be completed for clarity.

For further information on the points included in this form, see [Reporting Life Sciences Research](#). For further information on Nature Research policies, including our [data availability policy](#), see [Authors & Referees](#) and the [Editorial Policy Checklist](#).

### ► Experimental design

#### 1. Sample size

Describe how sample size was determined.

Line 563

#### 2. Data exclusions

Describe any data exclusions.

n/a

#### 3. Replication

Describe whether the experimental findings were reliably reproduced.

all replicates reported

#### 4. Randomization

Describe how samples/organisms/participants were allocated into experimental groups.

Lines 446-447

#### 5. Blinding

Describe whether the investigators were blinded to group allocation during data collection and/or analysis.

Lines 446-447

Note: all studies involving animals and/or human research participants must disclose whether blinding and randomization were used.

#### 6. Statistical parameters

For all figures and tables that use statistical methods, confirm that the following items are present in relevant figure legends (or in the Methods section if additional space is needed).

- |                                     |                                                                                                                                                                                                                                          |
|-------------------------------------|------------------------------------------------------------------------------------------------------------------------------------------------------------------------------------------------------------------------------------------|
| n/a                                 | Confirmed                                                                                                                                                                                                                                |
| <input type="checkbox"/>            | <input checked="" type="checkbox"/> The <u>exact sample size</u> ( <i>n</i> ) for each experimental group/condition, given as a discrete number and unit of measurement (animals, litters, cultures, etc.)                               |
| <input type="checkbox"/>            | <input checked="" type="checkbox"/> A description of how samples were collected, noting whether measurements were taken from distinct samples or whether the same sample was measured repeatedly                                         |
| <input checked="" type="checkbox"/> | <input type="checkbox"/> A statement indicating how many times each experiment was replicated                                                                                                                                            |
| <input type="checkbox"/>            | <input checked="" type="checkbox"/> The statistical test(s) used and whether they are one- or two-sided (note: only common tests should be described solely by name; more complex techniques should be described in the Methods section) |
| <input type="checkbox"/>            | <input checked="" type="checkbox"/> A description of any assumptions or corrections, such as an adjustment for multiple comparisons                                                                                                      |
| <input type="checkbox"/>            | <input checked="" type="checkbox"/> The test results (e.g. <i>P</i> values) given as exact values whenever possible and with confidence intervals noted                                                                                  |
| <input type="checkbox"/>            | <input checked="" type="checkbox"/> A clear description of statistics including <u>central tendency</u> (e.g. median, mean) and <u>variation</u> (e.g. standard deviation, interquartile range)                                          |
| <input type="checkbox"/>            | <input checked="" type="checkbox"/> Clearly defined error bars                                                                                                                                                                           |

See the web collection on [statistics for biologists](#) for further resources and guidance.

## ► Software

Policy information about [availability of computer code](#)

### 7. Software

Describe the software used to analyze the data in this study.

Fiji (image processing), MATLAB (simulations, fits), FEMM (simulations)

For manuscripts utilizing custom algorithms or software that are central to the paper but not yet described in the published literature, software must be made available to editors and reviewers upon request. We strongly encourage code deposition in a community repository (e.g. GitHub). *Nature Methods* [guidance for providing algorithms and software for publication](#) provides further information on this topic.

## ► Materials and reagents

Policy information about [availability of materials](#)

### 8. Materials availability

Indicate whether there are restrictions on availability of unique materials or if these materials are only available for distribution by a for-profit company.

n/a

### 9. Antibodies

Describe the antibodies used and how they were validated for use in the system under study (i.e. assay and species).

n/a

### 10. Eukaryotic cell lines

a. State the source of each eukaryotic cell line used.

n/a

b. Describe the method of cell line authentication used.

n/a

c. Report whether the cell lines were tested for mycoplasma contamination.

n/a

d. If any of the cell lines used are listed in the database of commonly misidentified cell lines maintained by [ICLAC](#), provide a scientific rationale for their use.

n/a

## ► Animals and human research participants

Policy information about [studies involving animals](#); when reporting animal research, follow the [ARRIVE guidelines](#)

### 11. Description of research animals

Provide details on animals and/or animal-derived materials used in the study.

Lines 449, 455, 462

Policy information about [studies involving human research participants](#)

### 12. Description of human research participants

Describe the covariate-relevant population characteristics of the human research participants.

n/a

## MRI Studies Reporting Summary

Form fields will expand as needed. Please do not leave fields blank.

## ▶ Experimental design

1. Describe the experimental design.
2. Specify the number of blocks, trials or experimental units per session and/or subject, and specify the length of each trial or block (if trials are blocked) and interval between trials.
3. Describe how behavioral performance was measured.

## ▶ Acquisition

4. Imaging
  - a. Specify the type(s) of imaging.
  - b. Specify the field strength (in Tesla).
  - c. Provide the essential sequence imaging parameters.
  - d. For diffusion MRI, provide full details of imaging parameters.
5. State area of acquisition.

## ▶ Preprocessing

6. Describe the software used for preprocessing.
7. Normalization
  - a. If data were normalized/standardized, describe the approach(es).
  - b. Describe the template used for normalization/transformation.
8. Describe your procedure for artifact and structured noise removal.
9. Define your software and/or method and criteria for volume censoring, and state the extent of such censoring.

## ▶ Statistical modeling &amp; inference

10. Define your model type and settings.
11. Specify the precise effect tested.

12. Analysis

a. Specify whether analysis is whole brain or ROI-based.

n/a

b. If ROI-based, describe how anatomical locations were determined.

n/a

13. State the statistic type for inference.

(See [Eklund et al. 2016](#).)

n/a

14. Describe the type of correction and how it is obtained for multiple comparisons.

n/a

15. Connectivity

a. For functional and/or effective connectivity, report the measures of dependence used and the model details.

n/a

b. For graph analysis, report the dependent variable and functional connectivity measure.

n/a

16. For multivariate modeling and predictive analysis, specify independent variables, features extraction and dimension reduction, model, training and evaluation metrics.

n/a
